# Supplementary material for: Large-scale transcriptomic analysis reveals that pridopidine reverses aberrant gene expression and activates neuroprotective pathways in the YAC128 HD mouse
Source: Springer Nature journal article supplement (doi:10.1186/s13024-018-0259-3), 2018-05-21

# *Gpr3*

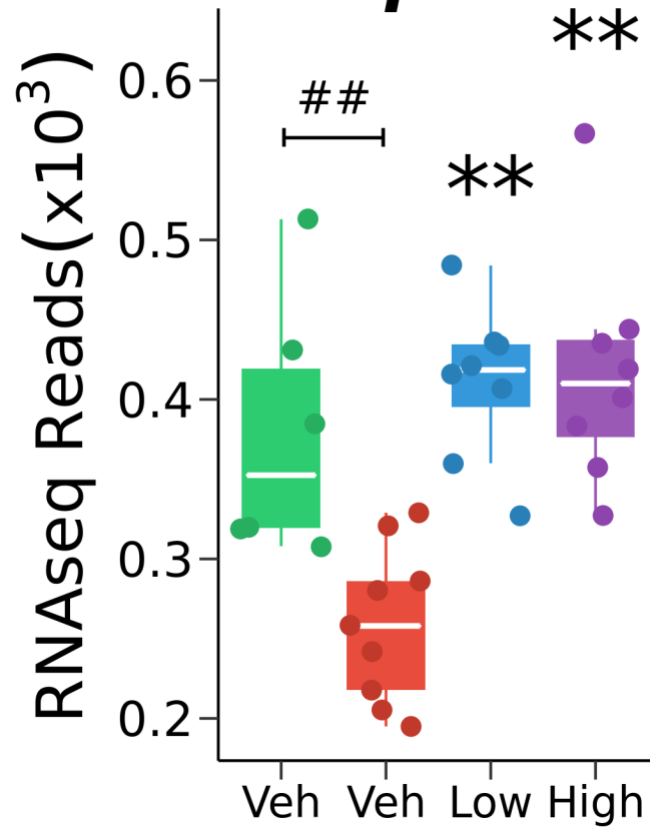

Supplement: 13024_2018_259_MOESM6_ESM.pdf [file 13024_2018_259_MOESM6_ESM.pdf]
