# Supplementary material for: Large-scale transcriptomic analysis reveals that pridopidine reverses aberrant gene expression and activates neuroprotective pathways in the YAC128 HD mouse
Source: Mol Neurodegener. 2018 May 21;13:25. doi: 10.1186/s13024-018-0259-3 (PMC5963017; doi:10.1186/s13024-018-0259-3)
Supplement: Supplementary file 2 — Table S2. Gene Ontology pathway analysis of genes differentially expressed in the mouse striatum. (XLSX 27 kb) [file 13024_2018_259_MOESM2_ESM.xlsx]

## Sheet: YAC128_Veh_v_WT_Veh
Additional file 2: Table S2. Gene ontology pathway analysis of genes differentially expressed in the mouse striatum
Adj. P value < 0.05
YAC128 Veh-WT Veh. enrichment using downregulated DEGs (raw fold change < -1.25 and adj. p-val < 0.05)
Biological Process	Genes	Adj. P
regulation of synaptic transmission, glutamatergic (GO:0051966)	RELN;ADORA2A;CNR1;LRRK2;HTR1B;GRIK2;DRD1;DRD2	0.000223228
response to amphetamine (GO:0001975)	EGR1;ADORA2A;PDE1B;PPP1R1B;DRD1;DRD2	0.000830031
response to ammonium ion (GO:0060359)	EGR1;HOMER1;CNR1;LRRK2;HTR1B;DRD1;DRD2;FOSL2	0.000830031
behavior (GO:0007610)	EGR1;EGR2;HOMER1;RGS14;PDE1B;LRRK2;OPRK1;HTR1B;GRIK2;ADCY5;RELN;DACH1;ADORA2A;CNR1;PENK;PPP1R1B;STRN;ITGA5;DRD1;PLCB1;DRD2	0.000830031
response to cocaine (GO:0042220)	EGR1;HOMER1;CNR1;HTR1B;DRD1;DRD2	0.00108317
negative regulation of MAP kinase activity (GO:0043407)	RGS4;RGS2;RGS14;DUSP1;SPRY2;DUSP18;DUSP6;DUSP14	0.00108317
cAMP metabolic process (GO:0046058)	PDE10A;ADORA2A;PDE1B;PDE8A;PTHLH;ADCY5	0.00108317
adenylate cyclase-modulating G-protein coupled receptor signaling pathway (GO:0007188)	GPR26;ADORA2A;CNR1;OPRK1;HTR1B;GPR3;DRD1;DRD2;PTHLH;ADCY5	0.00108317
response to amine (GO:0014075)	EGR1;ADORA2A;PDE1B;PPP1R1B;DRD1;DRD2	0.00216041
response to alkaloid (GO:0043279)	RYR1;EGR1;ADORA2A;HOMER1;CNR1;HTR1B;DRD1;DRD2;FOSL2	0.00218614
adenylate cyclase-activating G-protein coupled receptor signaling pathway (GO:0007189)	GPR26;ADORA2A;GPR3;DRD1;PTHLH;ADCY5	0.0042119
G-protein coupled receptor signaling pathway, coupled to cyclic nucleotide second messenger (GO:0007187)	GPR26;ADORA2A;CNR1;OPRK1;HTR1B;GPR3;DRD1;DRD2;PTHLH;ADCY5	0.0042119
cognition (GO:0050890)	EGR1;EGR2;RELN;RGS14;PDE1B;CNR1;PPP1R1B;ITGA5;DRD1;PLCB1;DRD2;GPR155	0.00478178
inactivation of MAPK activity (GO:0000188)	RGS4;DUSP1;DUSP18;DUSP6;DUSP14	0.00516629
negative regulation of MAPK cascade (GO:0043409)	RGS4;PER1;RGS2;RGS14;DUSP1;SPRY2;DUSP18;DUSP6;DUSP14	0.00516629
learning or memory (GO:0007611)	EGR1;EGR2;RELN;RGS14;PDE1B;CNR1;PPP1R1B;ITGA5;DRD1;PLCB1;DRD2	0.00529173
single-organism behavior (GO:0044708)	EGR1;EGR2;HOMER1;RGS14;PDE1B;LRRK2;GRIK2;RELN;CNR1;PPP1R1B;PENK;ITGA5;DRD1;PLCB1;DRD2	0.0064929
regulation of G-protein coupled receptor protein signaling pathway (GO:0008277)	RGS4;RGS2;RGS14;LRRK2;CRY1;PLCB1;DRD2;RGS9;KLK6	0.0064929
negative regulation of phosphorus metabolic process (GO:0010563)	RGS14;DUSP1;LRRK2;HTR1B;INHBA;DUSP18;DUSP6;DUSP14;RGS4;PER1;SH3RF2;RGS2;ADORA2A;PPP4R4;PPP1R1B;SPRY2;DRD2	0.00712677
negative regulation of phosphate metabolic process (GO:0045936)	RGS14;DUSP1;LRRK2;HTR1B;INHBA;DUSP18;DUSP6;DUSP14;RGS4;PER1;SH3RF2;RGS2;ADORA2A;PPP4R4;PPP1R1B;SPRY2;DRD2	0.00712677
cyclic nucleotide metabolic process (GO:0009187)	PDE10A;ADORA2A;PDE1B;PDE8A;PTHLH;ADCY5	0.00808581
positive regulation of synaptic transmission (GO:0050806)	EGR1;RELN;RGS14;ADORA2A;GRIK2;DRD1;DRD2	0.00828322
myelination (GO:0042552)	GJC3;EGR2;PLP1;TSPAN2;ASPA;KLK6	0.00828322
negative regulation of intracellular signal transduction (GO:1902532)	IVNS1ABP;RGS14;DUSP1;WWC1;ITPR1;DUSP18;DUSP6;DUSP14;RGS4;PER1;RGS2;SPRY2;TRIM59;DRD2	0.00883355
negative regulation of protein serine/threonine kinase activity (GO:0071901)	RGS4;RGS2;RGS14;DUSP1;SPRY2;DUSP18;DUSP6;DUSP14	0.00883355
axon ensheathment (GO:0008366)	GJC3;EGR2;PLP1;TSPAN2;ASPA;KLK6	0.00883355
ensheathment of neurons (GO:0007272)	GJC3;EGR2;PLP1;TSPAN2;ASPA;KLK6	0.00883355
negative regulation of G-protein coupled receptor protein signaling pathway (GO:0045744)	RGS4;RGS2;RGS14;CRY1;DRD2;RGS9	0.00883355
negative regulation of protein kinase activity (GO:0006469)	RGS4;RGS2;RGS14;ADORA2A;DUSP1;PPP1R1B;SPRY2;DUSP18;DUSP6;DUSP14	0.00939236
memory (GO:0007613)	RELN;RGS14;CNR1;ITGA5;DRD1;DRD2;PLCB1	0.00939236
associative learning (GO:0008306)	RELN;RGS14;PDE1B;PPP1R1B;DRD1;DRD2	0.0103897
visual learning (GO:0008542)	RGS14;PDE1B;PPP1R1B;DRD1;DRD2	0.0130955
negative regulation of synaptic transmission, glutamatergic (GO:0051967)	HTR1B;GRIK2;DRD2	0.0130955
negative regulation of phosphorylation (GO:0042326)	RGS14;DUSP1;LRRK2;INHBA;DUSP18;DUSP6;DUSP14;RGS4;PER1;RGS2;ADORA2A;PPP1R1B;SPRY2	0.0141157
negative regulation of kinase activity (GO:0033673)	RGS4;RGS2;ADORA2A;RGS14;DUSP1;PPP1R1B;SPRY2;DUSP18;DUSP6;DUSP14	0.0141157
dopamine receptor signaling pathway (GO:0007212)	DRD1;DRD2;RGS9;ADCY5	0.0150887
response to isoquinoline alkaloid (GO:0014072)	EGR1;CNR1;DRD2;FOSL2	0.0150887
regulation of synaptic transmission (GO:0050804)	EGR1;EGR2;RELN;ADORA2A;RGS14;CNR1;LRRK2;HTR1B;GRIK2;DRD1;DRD2	0.0150887
negative regulation of secretion by cell (GO:1903531)	IL33;ACVR1C;CNR1;CRY1;HTR1B;SSC5D;INHBA;DRD2	0.0156281
behavioral response to cocaine (GO:0048148)	HOMER1;DRD1;DRD2	0.0176744
prepulse inhibition (GO:0060134)	ADORA2A;DRD1;DRD2	0.0176744
synaptic transmission, dopaminergic (GO:0001963)	ADORA2A;DRD1;DRD2	0.0176744
visual behavior (GO:0007632)	RGS14;PDE1B;PPP1R1B;DRD1;DRD2	0.0176744
astrocyte development (GO:0014002)	PLP1;TSPAN2;DRD1	0.0176744
negative regulation of protein phosphorylation (GO:0001933)	RGS4;RGS2;ADORA2A;RGS14;DUSP1;LRRK2;PPP1R1B;SPRY2;DUSP18;DUSP6;DUSP14	0.0204513
locomotory behavior (GO:0007626)	ADORA2A;PDE1B;LRRK2;PENK;OPRK1;STRN;DRD1;DRD2;ADCY5	0.0223975
regulation of synaptic transmission, GABAergic (GO:0032228)	ADORA2A;CNR1;HTR1B;DRD2	0.027662
negative regulation of secretion (GO:0051048)	IL33;ACVR1C;CNR1;CRY1;HTR1B;SSC5D;INHBA;DRD2	0.0280064
regulation of synaptic plasticity (GO:0048167)	EGR1;EGR2;ADORA2A;RGS14;GRIK2;DRD1;DRD2	0.0323491
regulation of amine transport (GO:0051952)	ADORA2A;CNR1;HTR1B;DRD1;DRD2	0.0366447
cAMP catabolic process (GO:0006198)	PDE10A;PDE1B;PDE8A	0.0373989
regulation of catecholamine secretion (GO:0050433)	ADORA2A;CNR1;HTR1B;DRD2	0.0393784
negative regulation of locomotion (GO:0040013)	OSBPL8;IL33;ACVR1C;DACH1;ADORA2A;PKP2;TRIM59;PLCB1;DRD2	0.0420784
cellular response to organic cyclic compound (GO:0071407)	RYR1;EGR1;NR4A1;EGR2;BMP2;NR4A3;TIPARP;VDR;LRRK2;INHBA;DRD1	0.0429297
synaptic transmission (GO:0007268)	HOMER1;ACTN2;KCNA4;OPRK1;HTR1B;GRIK2;ADCY5;ADORA2A;AKAP9;PLP1;DRD1;PLCB1;DRD2;SLC38A2	0.0441689
positive regulation of synaptic transmission, glutamatergic (GO:0051968)	RELN;ADORA2A;DRD1	0.044725
cellular response to gonadotropin stimulus (GO:0071371)	EGR1;EGR2;INHBA	0.044725
positive regulation of G-protein coupled receptor protein signaling pathway (GO:0045745)	LRRK2;DRD2;KLK6	0.044725
protein kinase C-activating G-protein coupled receptor signaling pathway (GO:0007205)	ADORA2A;CISH;DGKB;HTR1B	0.044725
regulation of dopamine secretion (GO:0014059)	CNR1;HTR1B;DRD2	0.044725
cyclic nucleotide catabolic process (GO:0009214)	PDE10A;PDE1B;PDE8A	0.044725
termination of G-protein coupled receptor signaling pathway (GO:0038032)	RGS4;RGS2;RGS14;RGS9	0.0447803
telencephalon cell migration (GO:0022029)	RELN;LRRK2;DRD1;DRD2	0.0484888

## Sheet: YAC128_10mgkg_v_YAC128_Veh
YAC128 10 mg/kg pridopidine-YAC128 Veh, enrichment using downregulated DEGs (raw fold change < -1.25 and adj. p-val < 0.05)
Biological Process	Genes	Adj. P
response to cAMP (GO:0051591)	EGR1;EGR2;EGR4;DUSP1;FOSB;FOS;JUNB;FOSL2	2.48824e-09
response to organophosphorus (GO:0046683)	EGR1;EGR2;EGR4;DUSP1;FOSB;FOS;JUNB;FOSL2	1.13373e-08
response to purine-containing compound (GO:0014074)	EGR1;EGR2;EGR4;DUSP1;FOSB;FOS;JUNB;FOSL2	1.86958e-08
cellular response to hormone stimulus (GO:0032870)	NR4A1;EGR1;EGR2;NR4A3;EGR4;DUSP1;FOSB;IRS2;FOS;JUNB;FOSL2	5.90253e-08
negative regulation of kinase activity (GO:0033673)	DUSP5;RGS2;DUSP1;IRS2;DUSP6;GADD45G;DUSP14	9.37591e-06
response to corticosterone (GO:0051412)	FOSB;FOS;JUNB;FOSL2	9.48413e-06
negative regulation of phosphorylation (GO:0042326)	PER1;DUSP5;RGS2;DUSP1;IRS2;DUSP6;GADD45G;DUSP14	9.66876e-06
negative regulation of MAPK cascade (GO:0043409)	PER1;DUSP5;RGS2;DUSP1;DUSP6;DUSP14	1.03802e-05
response to mineralocorticoid (GO:0051385)	FOSB;FOS;JUNB;FOSL2	1.45265e-05
negative regulation of MAP kinase activity (GO:0043407)	DUSP5;RGS2;DUSP1;DUSP6;DUSP14	1.55257e-05
response to steroid hormone (GO:0048545)	NR4A1;EGR1;NR4A3;DUSP1;FOSB;FOS;JUNB;FOSL2	1.62446e-05
inactivation of MAPK activity (GO:0000188)	DUSP5;DUSP1;DUSP6;DUSP14	1.66785e-05
response to progesterone (GO:0032570)	FOSB;FOS;JUNB;FOSL2	1.99706e-05
negative regulation of transferase activity (GO:0051348)	DUSP5;RGS2;DUSP1;IRS2;DUSP6;GADD45G;DUSP14	3.37618e-05
negative regulation of protein kinase activity (GO:0006469)	DUSP5;RGS2;DUSP1;DUSP6;GADD45G;DUSP14	5.02672e-05
negative regulation of phosphorus metabolic process (GO:0010563)	PER1;DUSP5;RGS2;DUSP1;IRS2;DUSP6;GADD45G;DUSP14	5.07358e-05
negative regulation of phosphate metabolic process (GO:0045936)	PER1;DUSP5;RGS2;DUSP1;IRS2;DUSP6;GADD45G;DUSP14	5.07358e-05
response to ketone (GO:1901654)	DUSP1;FOSB;FOS;JUNB;FOSL2	5.07358e-05
skeletal muscle cell differentiation (GO:0035914)	EGR1;NR4A1;EGR2;FOS	5.85017e-05
negative regulation of protein serine/threonine kinase activity (GO:0071901)	DUSP5;RGS2;DUSP1;DUSP6;DUSP14	7.96506e-05
negative regulation of intracellular signal transduction (GO:1902532)	DUSP5;PER1;RGS2;BCL6;DUSP1;DUSP6;DUSP14	8.23589e-05
response to glucocorticoid (GO:0051384)	DUSP1;FOSB;FOS;JUNB;FOSL2	0.000116639
cellular response to gonadotropin stimulus (GO:0071371)	EGR1;EGR2;EGR4	0.000138956
response to corticosteroid (GO:0031960)	DUSP1;FOSB;FOS;JUNB;FOSL2	0.000153745
negative regulation of protein phosphorylation (GO:0001933)	DUSP5;RGS2;DUSP1;DUSP6;GADD45G;DUSP14	0.000190659
regulation of protein serine/threonine kinase activity (GO:0071900)	DUSP5;RGS2;FZD5;DUSP1;DUSP6;GADD45G;DUSP14	0.000227479
response to alcohol (GO:0097305)	EGR1;DUSP1;FOSB;FOS;JUNB;FOSL2	0.000229691
regulation of MAP kinase activity (GO:0043405)	DUSP5;RGS2;FZD5;DUSP1;DUSP6;DUSP14	0.000229691
cellular response to organic cyclic compound (GO:0071407)	EGR1;NR4A1;EGR2;NR4A3;EGR4;TIPARP	0.000312338
response to isoquinoline alkaloid (GO:0014072)	EGR1;FOSB;FOSL2	0.0003361
response to gonadotropin (GO:0034698)	EGR1;EGR2;EGR4	0.000354042
response to mechanical stimulus (GO:0009612)	EGR1;FOSB;FOS;JUNB;FOSL2	0.000354042
transcription from RNA polymerase II promoter (GO:0006366)	EGR1;EGR2;FOSB;FOS;RREB1;FOSL2;POU3F4	0.000395269
response to calcium ion (GO:0051592)	DUSP1;FOSB;FOS;JUNB	0.000671573
peptidyl-tyrosine dephosphorylation (GO:0035335)	DUSP5;DUSP1;DUSP6;DUSP14	0.000705207
response to drug (GO:0042493)	EGR1;FOSB;FOS;JUNB;DUSP6;FOSL2	0.000758627
cellular response to calcium ion (GO:0071277)	FOSB;FOS;JUNB	0.000871174
cellular response to cAMP (GO:0071320)	EGR1;EGR2;EGR4	0.00123325
negative regulation of protein modification process (GO:0031400)	DUSP5;RGS2;DUSP1;DUSP6;GADD45G;DUSP14	0.0015186
regulation of neuronal synaptic plasticity (GO:0048168)	EGR1;EGR2;ARC	0.00153177
negative regulation of B cell apoptotic process (GO:0002903)	BCL6;IRS2	0.00255257
protein dephosphorylation (GO:0006470)	DUSP5;DUSP1;DUSP6;DUSP14	0.00345787
regulation of p38MAPK cascade (GO:1900744)	PER1;GADD45G	0.00356157
response to ammonium ion (GO:0060359)	EGR1;FOSB;FOSL2	0.00383862
endoderm formation (GO:0001706)	DUSP5;DUSP1	0.00468177
regulation of B cell apoptotic process (GO:0002902)	BCL6;IRS2	0.00602589
learning or memory (GO:0007611)	EGR1;EGR2;ARC;FOS	0.00678963
female pregnancy (GO:0007565)	FOSB;FOS;FOSL2	0.00741889
labyrinthine layer blood vessel development (GO:0060716)	FZD5;JUNB	0.00803383
cognition (GO:0050890)	EGR1;EGR2;ARC;FOS	0.0106667
cellular response to metal ion (GO:0071248)	FOSB;FOS;JUNB	0.0108985
response to morphine (GO:0043278)	FOSB;FOSL2	0.0131914
response to radiation (GO:0009314)	PER1;EGR1;DUSP1;FOS;JUNB	0.0139442
negative regulation of lymphocyte apoptotic process (GO:0070229)	BCL6;IRS2	0.0139442
response to metal ion (GO:0010038)	DUSP1;FOSB;FOS;JUNB	0.0139442
leukocyte differentiation (GO:0002521)	EGR1;BCL6;FZD5;JUNB	0.0139442
small GTPase mediated signal transduction (GO:0007264)	ARL4D;BCL6;IQGAP2;RND3;RREB1	0.0139442
cellular response to inorganic substance (GO:0071241)	FOSB;FOS;JUNB	0.0139442
response to alkaloid (GO:0043279)	EGR1;FOSB;FOSL2	0.0139442
placenta blood vessel development (GO:0060674)	FZD5;JUNB	0.0160195
multi-multicellular organism process (GO:0044706)	FOSB;FOS;FOSL2	0.0160195
regulation of synaptic plasticity (GO:0048167)	EGR1;EGR2;ARC	0.0160195
cellular response to steroid hormone stimulus (GO:0071383)	EGR1;NR4A1;NR4A3	0.0165259
dephosphorylation (GO:0016311)	DUSP5;DUSP1;DUSP6;DUSP14	0.0176502
positive regulation of B cell proliferation (GO:0030890)	BCL6;IRS2	0.0218876
multi-organism reproductive process (GO:0044703)	FOSB;FOS;FOSL2	0.0228478
regulation of meiotic cell cycle (GO:0051445)	DUSP1;GPR3	0.0236413
regulation of JNK cascade (GO:0046328)	PER1;FZD5;GADD45G	0.0259725
negative regulation of leukocyte apoptotic process (GO:2000107)	BCL6;IRS2	0.026686
response to light stimulus (GO:0009416)	PER1;DUSP1;FOS;JUNB	0.0275421
formation of primary germ layer (GO:0001704)	DUSP5;DUSP1	0.0325498
regulation of stress-activated MAPK cascade (GO:0032872)	PER1;FZD5;GADD45G	0.0358493
regulation of lymphocyte apoptotic process (GO:0070228)	BCL6;IRS2	0.0358493
regulation of stress-activated protein kinase signaling cascade (GO:0070302)	PER1;FZD5;GADD45G	0.0358845
lymphocyte differentiation (GO:0030098)	EGR1;FZD5;BCL6	0.0359903
single-organism behavior (GO:0044708)	EGR1;EGR2;ARC;FOS	0.0385884
response to peptide hormone (GO:0043434)	EGR1;EGR2;IRS2;JUNB	0.0388404
response to inorganic substance (GO:0010035)	DUSP1;FOSB;FOS;JUNB	0.0401187
regulation of B cell proliferation (GO:0030888)	BCL6;IRS2	0.0401187
brain development (GO:0007420)	EGR2;FZD5;IRS2	0.0421029
transcription initiation from RNA polymerase II promoter (GO:0006367)	NR4A1;NR4A3;JUNB	0.0421029
response to peptide (GO:1901652)	EGR1;EGR2;IRS2;JUNB	0.0429113
pattern specification process (GO:0007389)	EGR2;ARC;FZD5;DUSP6	0.0429113
camera-type eye development (GO:0043010)	FZD5;SLC25A25	0.0429113
positive regulation of B cell activation (GO:0050871)	BCL6;IRS2	0.0429113
steroid hormone mediated signaling pathway (GO:0043401)	NR4A1;NR4A3	0.0437773
transmembrane receptor protein serine/threonine kinase signaling pathway (GO:0007178)	EGR1;FOS;JUNB	0.044673
glial cell differentiation (GO:0010001)	EGR1;EGR2	0.0456548

## Sheet: YAC128_30mgkg_v_YAC128_Veh
YAC128 30 mg/kg pridopidine -YAC128 Veh, enrichment using downregulated DEGs (raw fold change < -1.25 and adj. p-val < 0.05)
Biological Process	Genes	Adj. P
response to cAMP (GO:0051591)	EGR1;EGR2;EGR3;EGR4;DUSP1;FOSB;FOS;JUNB;FOSL2	2.52807e-09
response to organophosphorus (GO:0046683)	EGR1;EGR2;EGR3;EGR4;DUSP1;FOSB;FOS;JUNB;FOSL2	1.50976e-08
response to purine-containing compound (GO:0014074)	EGR1;EGR2;EGR3;EGR4;DUSP1;FOSB;FOS;JUNB;FOSL2	2.77416e-08
skeletal muscle cell differentiation (GO:0035914)	EGR1;NR4A1;BTG2;EGR2;FOS;ATF3	6.70148e-07
cellular response to hormone stimulus (GO:0032870)	NR4A1;EGR1;EGR2;NR4A3;EGR3;EGR4;DUSP1;FOSB;IRS2;FOS;JUNB;FOSL2	6.70148e-07
negative regulation of kinase activity (GO:0033673)	DUSP5;RGS2;DUSP1;IRS2;TRIB1;DUSP6;GADD45G;DUSP14	1.19456e-05
cellular response to gonadotropin stimulus (GO:0071371)	EGR1;EGR2;EGR3;EGR4	2.03919e-05
negative regulation of phosphorylation (GO:0042326)	PER1;DUSP5;RGS2;DUSP1;IRS2;TRIB1;DUSP6;GADD45G;DUSP14	2.73418e-05
response to corticosterone (GO:0051412)	FOSB;FOS;JUNB;FOSL2	4.54305e-05
response to gonadotropin (GO:0034698)	EGR1;EGR2;EGR3;EGR4	7.30703e-05
negative regulation of protein kinase activity (GO:0006469)	DUSP5;RGS2;DUSP1;TRIB1;DUSP6;GADD45G;DUSP14	7.30703e-05
response to mineralocorticoid (GO:0051385)	FOSB;FOS;JUNB;FOSL2	7.38085e-05
negative regulation of transferase activity (GO:0051348)	DUSP5;RGS2;DUSP1;IRS2;TRIB1;DUSP6;GADD45G;DUSP14	7.38085e-05
inactivation of MAPK activity (GO:0000188)	DUSP5;DUSP1;DUSP6;DUSP14	9.52903e-05
negative regulation of MAPK cascade (GO:0043409)	PER1;DUSP5;RGS2;DUSP1;DUSP6;DUSP14	9.52903e-05
negative regulation of MAP kinase activity (GO:0043407)	DUSP5;RGS2;DUSP1;DUSP6;DUSP14	0.000106744
response to progesterone (GO:0032570)	FOSB;FOS;JUNB;FOSL2	0.0001089
negative regulation of phosphate metabolic process (GO:0045936)	PER1;DUSP5;RGS2;DUSP1;IRS2;TRIB1;DUSP6;GADD45G;DUSP14	0.00019742
negative regulation of phosphorus metabolic process (GO:0010563)	PER1;DUSP5;RGS2;DUSP1;IRS2;TRIB1;DUSP6;GADD45G;DUSP14	0.00019742
cellular response to cAMP (GO:0071320)	EGR1;EGR2;EGR3;EGR4	0.000273529
negative regulation of protein phosphorylation (GO:0001933)	DUSP5;RGS2;DUSP1;TRIB1;DUSP6;GADD45G;DUSP14	0.00030316
response to steroid hormone (GO:0048545)	NR4A1;EGR1;NR4A3;DUSP1;FOSB;FOS;JUNB;FOSL2	0.00030316
response to mechanical stimulus (GO:0009612)	EGR1;BTG2;FOSB;FOS;JUNB;FOSL2	0.000352615
regulation of MAP kinase activity (GO:0043405)	DUSP5;RGS2;FZD5;DUSP1;TRIB1;DUSP6;DUSP14	0.000370508
response to ketone (GO:1901654)	DUSP1;FOSB;FOS;JUNB;FOSL2	0.000383903
cellular response to organic cyclic compound (GO:0071407)	EGR1;NR4A1;EGR2;EGR3;NR4A3;EGR4;TIPARP	0.00051733
regulation of protein serine/threonine kinase activity (GO:0071900)	DUSP5;RGS2;FZD5;DUSP1;TRIB1;DUSP6;GADD45G;DUSP14	0.000567902
learning or memory (GO:0007611)	EGR1;EGR2;ARC;BTG2;PLK2;FOS	0.000567902
negative regulation of protein serine/threonine kinase activity (GO:0071901)	DUSP5;RGS2;DUSP1;DUSP6;DUSP14	0.000583656
response to glucocorticoid (GO:0051384)	DUSP1;FOSB;FOS;JUNB;FOSL2	0.000900275
sister chromatid segregation (GO:0000819)	TOP2A;KIF18B;ESPL1	0.0010142
cognition (GO:0050890)	EGR1;EGR2;ARC;BTG2;PLK2;FOS	0.00106875
response to corticosteroid (GO:0031960)	DUSP1;FOSB;FOS;JUNB;FOSL2	0.00116764
response to isoquinoline alkaloid (GO:0014072)	EGR1;FOSB;FOSL2	0.00134966
response to alcohol (GO:0097305)	EGR1;DUSP1;FOSB;FOS;JUNB;FOSL2	0.0027376
chromosome segregation (GO:0007059)	TOP2A;SGOL1;KIF18B;ESPL1	0.0027376
negative regulation of protein modification process (GO:0031400)	DUSP5;RGS2;DUSP1;TRIB1;DUSP6;GADD45G;DUSP14	0.00304273
cellular response to calcium ion (GO:0071277)	FOSB;FOS;JUNB	0.00382768
response to calcium ion (GO:0051592)	DUSP1;FOSB;FOS;JUNB	0.00396856
peptidyl-tyrosine dephosphorylation (GO:0035335)	DUSP5;DUSP1;DUSP6;DUSP14	0.00417633
endothelial cell chemotaxis (GO:0035767)	NR4A1;EGR3	0.0047064
meiotic chromosome segregation (GO:0045132)	SGOL1;ESPL1	0.00589659
regulation of neuronal synaptic plasticity (GO:0048168)	EGR1;EGR2;ARC	0.00638892
regulation of synaptic plasticity (GO:0048167)	EGR1;EGR2;ARC;PLK2	0.00707544
negative regulation of intracellular signal transduction (GO:1902532)	DUSP5;PER1;RGS2;DUSP1;DUSP6;DUSP14	0.00747945
positive regulation of proteasomal ubiquitin-dependent protein catabolic process (GO:0032436)	ESPL1;PLK2;TRIB1	0.00806107
response to drug (GO:0042493)	EGR1;FOSB;FOS;JUNB;DUSP6;FOSL2	0.00821046
positive regulation of protein catabolic process (GO:0045732)	ESPL1;TIPARP;PLK2;TRIB1	0.00878811
single-organism behavior (GO:0044708)	EGR1;EGR2;ARC;BTG2;PLK2;FOS	0.00886376
regulation of p38MAPK cascade (GO:1900744)	PER1;GADD45G	0.00903278
positive regulation of proteasomal protein catabolic process (GO:1901800)	ESPL1;PLK2;TRIB1	0.0100338
pattern specification process (GO:0007389)	EGR2;ARC;BTG2;FZD5;ARMC4;DUSP6	0.0115463
endoderm formation (GO:0001706)	DUSP5;DUSP1	0.0117079
cell migration involved in sprouting angiogenesis (GO:0002042)	NR4A1;EGR3	0.0129949
positive regulation of proteolysis involved in cellular protein catabolic process (GO:1903052)	ESPL1;PLK2;TRIB1	0.0129949
response to ammonium ion (GO:0060359)	EGR1;FOSB;FOSL2	0.0133428
positive regulation of cellular protein catabolic process (GO:1903364)	ESPL1;PLK2;TRIB1	0.0136966
protein dephosphorylation (GO:0006470)	DUSP5;DUSP1;DUSP6;DUSP14	0.0162124
entrainment of circadian clock by photoperiod (GO:0043153)	PER1;SIK1	0.0175586
labyrinthine layer blood vessel development (GO:0060716)	FZD5;JUNB	0.0192632
response to radiation (GO:0009314)	PER1;EGR1;DUSP1;SIK1;FOS;JUNB	0.0200975
mitotic sister chromatid segregation (GO:0000070)	KIF18B;ESPL1	0.0206767
entrainment of circadian clock (GO:0009649)	PER1;SIK1	0.0235521
cellular response to fibroblast growth factor stimulus (GO:0044344)	NR4A1;EGR3;IRS2;HBEGF	0.0235521
photoperiodism (GO:0009648)	PER1;SIK1	0.0235521
female pregnancy (GO:0007565)	FOSB;FOS;FOSL2	0.0235521
response to fibroblast growth factor (GO:0071774)	NR4A1;EGR3;IRS2;HBEGF	0.0243595
blood vessel endothelial cell migration (GO:0043534)	NR4A1;EGR3	0.024609
transcription from RNA polymerase II promoter (GO:0006366)	EGR1;EGR2;FOSB;FOS;FOSL2;POU3F4	0.024609
response to light stimulus (GO:0009416)	PER1;DUSP1;SIK1;FOS;JUNB	0.0249785
stress-activated MAPK cascade (GO:0051403)	FOS;TRIB1;DUSP6	0.0249785
stress-activated protein kinase signaling cascade (GO:0031098)	FOS;TRIB1;DUSP6	0.0262478
cellular response to vascular endothelial growth factor stimulus (GO:0035924)	NR4A1;EGR3	0.0268114
response to morphine (GO:0043278)	FOSB;FOSL2	0.0268114
meiotic cell cycle process (GO:1903046)	TOP2A;SGOL1;ESPL1	0.0268114
behavior (GO:0007610)	EGR1;EGR2;ARC;BTG2;PLK2;FOS	0.0282941
cellular response to metal ion (GO:0071248)	FOSB;FOS;JUNB	0.031201
peripheral nervous system development (GO:0007422)	EGR2;EGR3	0.0322401
response to electrical stimulus (GO:0051602)	EGR1;BTG2	0.0341298
long-term synaptic potentiation (GO:0060291)	EGR1;PLK2	0.035602
placenta blood vessel development (GO:0060674)	FZD5;JUNB	0.035602
response to peptide hormone (GO:0043434)	EGR1;EGR2;BTG2;IRS2;JUNB	0.0366778
cellular response to inorganic substance (GO:0071241)	FOSB;FOS;JUNB	0.0389901
response to alkaloid (GO:0043279)	EGR1;FOSB;FOSL2	0.0395196
learning (GO:0007612)	BTG2;ARC;FOS	0.0431376
response to peptide (GO:1901652)	EGR1;EGR2;BTG2;IRS2;JUNB	0.0434023
regulation of proteasomal ubiquitin-dependent protein catabolic process (GO:0032434)	ESPL1;PLK2;TRIB1	0.0434023
regulation of mitotic cell cycle (GO:0007346)	TOP2A;ESPL1;DUSP1;PLK2;SIK1	0.0463124
microtubule cytoskeleton organization (GO:0000226)	SGOL1;KIF18B;ESPL1;PLK2	0.0473613
regulation of synaptic transmission (GO:0050804)	EGR1;EGR2;ARC;PLK2	0.0473613
multi-multicellular organism process (GO:0044706)	FOSB;FOS;FOSL2	0.0473613
regionalization (GO:0003002)	BTG2;EGR2;ARC;DUSP6	0.0476914
cellular response to steroid hormone stimulus (GO:0071383)	EGR1;NR4A1;NR4A3	0.0476914
regulation of meiotic cell cycle (GO:0051445)	DUSP1;GPR3	0.0488866

## Sheet: WT_30mgkg_v_WT_Veh
WT 30 mg/kg pridopidine-WT Veh, enrichment using downregulated DEGs (raw fold change < -1.25 and adj. p-val < 0.05)
Biological Process	Genes	Adj. P
response to cAMP (GO:0051591)	EGR2;DUSP1;FOSB;FOS;JUNB	2.54214e-06
skeletal muscle cell differentiation (GO:0035914)	NR4A1;BTG2;EGR2;FOS	4.38738e-06
response to purine-containing compound (GO:0014074)	EGR2;DUSP1;FOSB;FOS;JUNB	4.38738e-06
response to organophosphorus (GO:0046683)	EGR2;DUSP1;FOSB;FOS;JUNB	4.38738e-06
regulation of p38MAPK cascade (GO:1900744)	PER1;GADD45B;GADD45G	6.75347e-06
response to corticosterone (GO:0051412)	FOSB;FOS;JUNB	4.50621e-05
response to calcium ion (GO:0051592)	DUSP1;FOSB;FOS;JUNB	4.69082e-05
cellular response to hormone stimulus (GO:0032870)	NR4A1;EGR2;DUSP1;FOSB;FOS;JUNB	4.69082e-05
response to mineralocorticoid (GO:0051385)	FOSB;FOS;JUNB	4.98918e-05
response to ketone (GO:1901654)	DUSP1;FOSB;FOS;JUNB	4.98918e-05
response to progesterone (GO:0032570)	FOSB;FOS;JUNB	7.53542e-05
response to glucocorticoid (GO:0051384)	DUSP1;FOSB;FOS;JUNB	8.92895e-05
negative regulation of phosphorylation (GO:0042326)	PER1;DUSP5;GADD45B;DUSP1;GADD45G	9.50295e-05
cellular response to calcium ion (GO:0071277)	FOSB;FOS;JUNB	9.50295e-05
response to light stimulus (GO:0009416)	PER1;DUSP1;SIK1;FOS;JUNB	9.50295e-05
response to corticosteroid (GO:0031960)	DUSP1;FOSB;FOS;JUNB	9.50295e-05
response to steroid hormone (GO:0048545)	NR4A1;DUSP1;FOSB;FOS;JUNB	0.000165959
response to mechanical stimulus (GO:0009612)	BTG2;FOSB;FOS;JUNB	0.000198009
negative regulation of protein kinase activity (GO:0006469)	DUSP5;GADD45B;DUSP1;GADD45G	0.00024849
negative regulation of kinase activity (GO:0033673)	DUSP5;GADD45B;DUSP1;GADD45G	0.000279485
learning or memory (GO:0007611)	BTG2;EGR2;ARC;FOS	0.000279485
positive regulation of p38MAPK cascade (GO:1900745)	GADD45B;GADD45G	0.000279485
response to radiation (GO:0009314)	PER1;DUSP1;SIK1;FOS;JUNB	0.000293731
negative regulation of phosphate metabolic process (GO:0045936)	PER1;DUSP5;GADD45B;DUSP1;GADD45G	0.000308345
negative regulation of phosphorus metabolic process (GO:0010563)	PER1;DUSP5;GADD45B;DUSP1;GADD45G	0.000308345
activation of MAPKKK activity (GO:0000185)	GADD45B;GADD45G	0.000308345
cognition (GO:0050890)	BTG2;EGR2;ARC;FOS	0.000359195
response to metal ion (GO:0010038)	DUSP1;FOSB;FOS;JUNB	0.000545755
negative regulation of protein phosphorylation (GO:0001933)	DUSP5;GADD45B;DUSP1;GADD45G	0.000568382
endoderm formation (GO:0001706)	DUSP5;DUSP1	0.000652178
response to alcohol (GO:0097305)	DUSP1;FOSB;FOS;JUNB	0.000652178
negative regulation of transferase activity (GO:0051348)	DUSP5;GADD45B;DUSP1;GADD45G	0.000704247
cellular response to metal ion (GO:0071248)	FOSB;FOS;JUNB	0.000704247
cellular response to inorganic substance (GO:0071241)	FOSB;FOS;JUNB	0.000928799
entrainment of circadian clock by photoperiod (GO:0043153)	PER1;SIK1	0.000955475
learning (GO:0007612)	BTG2;ARC;FOS	0.0010011
entrainment of circadian clock (GO:0009649)	PER1;SIK1	0.00132621
photoperiodism (GO:0009648)	PER1;SIK1	0.00132621
negative regulation of MAPK cascade (GO:0043409)	PER1;DUSP5;DUSP1	0.00132922
transforming growth factor beta receptor signaling pathway (GO:0007179)	PPP1R15A;FOS;JUNB	0.00141756
single-organism behavior (GO:0044708)	BTG2;EGR2;ARC;FOS	0.00144754
response to inorganic substance (GO:0010035)	DUSP1;FOSB;FOS;JUNB	0.00153679
regulation of JNK cascade (GO:0046328)	PER1;GADD45B;GADD45G	0.00176834
negative regulation of protein modification process (GO:0031400)	DUSP5;GADD45B;DUSP1;GADD45G	0.00211274
regulation of protein serine/threonine kinase activity (GO:0071900)	DUSP5;GADD45B;DUSP1;GADD45G	0.00219676
inactivation of MAPK activity (GO:0000188)	DUSP5;DUSP1	0.00219676
response to transforming growth factor beta (GO:0071559)	PPP1R15A;FOS;JUNB	0.00222065
cellular response to transforming growth factor beta stimulus (GO:0071560)	PPP1R15A;FOS;JUNB	0.00222065
regulation of stress-activated MAPK cascade (GO:0032872)	PER1;GADD45B;GADD45G	0.00232588
regulation of stress-activated protein kinase signaling cascade (GO:0070302)	PER1;GADD45B;GADD45G	0.00232588
transmembrane receptor protein serine/threonine kinase signaling pathway (GO:0007178)	PPP1R15A;FOS;JUNB	0.00339974
behavior (GO:0007610)	BTG2;EGR2;ARC;FOS	0.00372945
formation of primary germ layer (GO:0001704)	DUSP5;DUSP1	0.00421296
regulation of neuronal synaptic plasticity (GO:0048168)	EGR2;ARC	0.0043167
regionalization (GO:0003002)	BTG2;EGR2;ARC	0.00617364
regulation of sodium ion transport (GO:0002028)	PER1;SIK1	0.00665558
activation of MAPKK activity (GO:0000186)	GADD45B;GADD45G	0.00665558
regulation of translation (GO:0006417)	PPP1R15A;PER1;BTG2	0.00709467
associative learning (GO:0008306)	BTG2;FOS	0.00753852
negative regulation of MAP kinase activity (GO:0043407)	DUSP5;DUSP1	0.00958575
regulation of circadian rhythm (GO:0042752)	PER1;SIK1	0.00993947
female pregnancy (GO:0007565)	FOSB;FOS	0.0121984
negative regulation of intracellular signal transduction (GO:1902532)	PER1;DUSP5;DUSP1	0.0140489
response to drug (GO:0042493)	FOSB;FOS;JUNB	0.0148779
response to peptide hormone (GO:0043434)	BTG2;EGR2;JUNB	0.0158519
peptidyl-tyrosine dephosphorylation (GO:0035335)	DUSP5;DUSP1	0.0164034
response to peptide (GO:1901652)	BTG2;EGR2;JUNB	0.0174969
pattern specification process (GO:0007389)	BTG2;EGR2;ARC	0.0174969
positive regulation of JNK cascade (GO:0046330)	GADD45B;GADD45G	0.0174969
regulation of cellular response to stress (GO:0080135)	PER1;GADD45B;GADD45G	0.0197515
negative regulation of protein serine/threonine kinase activity (GO:0071901)	DUSP5;DUSP1	0.0200012
positive regulation of stress-activated MAPK cascade (GO:0032874)	GADD45B;GADD45G	0.0200012
positive regulation of stress-activated protein kinase signaling cascade (GO:0070304)	GADD45B;GADD45G	0.0200551
regulation of synaptic plasticity (GO:0048167)	EGR2;ARC	0.02011
multi-multicellular organism process (GO:0044706)	FOSB;FOS	0.020166
posttranscriptional regulation of gene expression (GO:0010608)	PPP1R15A;PER1;BTG2	0.0228136
cell cycle arrest (GO:0007050)	PPP1R15A;DUSP1	0.0257585
multi-organism reproductive process (GO:0044703)	FOSB;FOS	0.0257585
response to reactive oxygen species (GO:0000302)	DUSP1;FOS	0.0257864
transcription from RNA polymerase II promoter (GO:0006366)	EGR2;FOSB;FOS	0.0263753
anterior/posterior pattern specification (GO:0009952)	BTG2;ARC	0.0282246
endothelial cell chemotaxis (GO:0035767)	NR4A1	0.0282246
embryonic process involved in female pregnancy (GO:0060136)	JUNB	0.0282246
protein dephosphorylation (GO:0006470)	DUSP5;DUSP1	0.0302814
facial nerve structural organization (GO:0021612)	EGR2	0.0302814
response to gravity (GO:0009629)	FOS	0.0302814
peptidyl-threonine dephosphorylation (GO:0035970)	DUSP1	0.0302814
macromolecule methylation (GO:0043414)	BTG2;FOS	0.0314635
negative regulation of gluconeogenesis (GO:0045721)	SIK1	0.0314635
regulation of mitotic cell cycle spindle assembly checkpoint (GO:0090266)	DUSP1	0.0314635
regulation of mitotic spindle checkpoint (GO:1903504)	DUSP1	0.0314635
sleep (GO:0030431)	FOS	0.0314635
regulation of cytokine production involved in inflammatory response (GO:1900015)	PER1	0.0314635
mitotic cell cycle arrest (GO:0071850)	DUSP1	0.0335158
positive regulation of nuclear-transcribed mRNA poly(A) tail shortening (GO:0060213)	BTG2	0.0335158
regulation of nuclear-transcribed mRNA poly(A) tail shortening (GO:0060211)	BTG2	0.0335158
transcription initiation from RNA polymerase II promoter (GO:0006367)	NR4A1;JUNB	0.0351343
cranial nerve structural organization (GO:0021604)	EGR2	0.0351343
regulation of nuclear-transcribed mRNA catabolic process, deadenylation-dependent decay (GO:1900151)	BTG2	0.0351343
positive regulation of nuclear-transcribed mRNA catabolic process, deadenylation-dependent decay (GO:1900153)	BTG2	0.0351343
cell migration involved in sprouting angiogenesis (GO:0002042)	NR4A1	0.0425335
positive regulation of mRNA catabolic process (GO:0061014)	BTG2	0.0425335
regulation of spindle checkpoint (GO:0090231)	DUSP1	0.0425335
dentate gyrus development (GO:0021542)	BTG2	0.0436566
regulation of triglyceride biosynthetic process (GO:0010866)	SIK1	0.0436566
positive regulation of mRNA 3'-end processing (GO:0031442)	BTG2	0.0436566
SMAD protein signal transduction (GO:0060395)	FOS	0.0436566
DNA-templated transcription, initiation (GO:0006352)	NR4A1;JUNB	0.0443772
trophectodermal cell differentiation (GO:0001829)	JUNB	0.0451032
regulation of mRNA catabolic process (GO:0061013)	BTG2	0.0451032
anatomical structure arrangement (GO:0048532)	EGR2	0.0456629
cellular response to gonadotropin stimulus (GO:0071371)	EGR2	0.0456629
decidualization (GO:0046697)	JUNB	0.0456629
regulation of mRNA 3'-end processing (GO:0031440)	BTG2	0.0456629
negative regulation of meiotic cell cycle (GO:0051447)	DUSP1	0.0456629
regulation of hair cycle (GO:0042634)	PER1	0.0469567
labyrinthine layer blood vessel development (GO:0060716)	JUNB	0.0469567
negative regulation of neural precursor cell proliferation (GO:2000178)	BTG2	0.0469567
regulation of synaptic transmission (GO:0050804)	EGR2;ARC	0.0489834
regulation of anoikis (GO:2000209)	SIK1	0.0489834
rhythmic process (GO:0048511)	PER1;EGR2	0.0499937
regulation of metal ion transport (GO:0010959)	PER1;SIK1	0.0499937
activation of protein kinase activity (GO:0032147)	GADD45B;GADD45G	0.0499937
histone H3 deacetylation (GO:0070932)	PER1	0.0499937
